# Supplementary material for: Virus survey in populations of two subspecies of bent-winged bats (Miniopterus orianae bassanii and oceanensis) in south-eastern Australia reveals a high prevalence of diverse herpesviruses
Source: PLoS One. 2018 May 24;13(5):e0197625. doi: 10.1371/journal.pone.0197625 (PMC5967723; doi:10.1371/journal.pone.0197625)
Supplement: S2 Table — Pairwise alignments of amino acids were generated with MAFFT using the BLOSUM62 matrix. More similar sequences are in green. Less similar sequences are in red. (XLSX) [file pone.0197625.s002.xlsx]

## Sheet: LGIG tree percent identity
	Fruit_bat_alphaherpesvirus_1 AB825953.1	Human_Alphaherpesvirus_1 BAM29052.1	Felid_Alphaherpesvirus_1 CAA12264.1	Equid_Alphaherpesvirus_4 NP045247.1	Bat_herpesvirus_isolate_RB_13HN56 KR261852.1	Psittacid_Alphaherpesvirus_1 AAQ73709.1	Gallid_Alphaherpesvirus_1 AAD56202.1	Miniopterus_schreibersii_Betaherpesvirus_2 AMY98771.1	CH6-like_viruses	Bat_Betaherpesvirus_B7D8 AFK83885.1	Bat_Betaherpesvirus_2 BAI22795.1	E22-like_viruses	D15-like_viruses	CH20-like_viruses	NG46-like_viruses	Egyptian_Fruit_Bat_Betaherpesvirus ACY82598.1	Tupaiid_Betaherpesvirus_1 AAD08667.1	Suid_Betaherpesvirus_2 AAF80107.1	Bat_Herpesvirus ALH21060.1	N7050-like_viruses	Bat_Herpesvirus BAF80466.1	Ateline_Gammaherpesvirus_3 NP047983.1	Bovine_Gammapherpesvirus_4 AAC59454.1	Callitrichine_Gammaherpesvirus_3 AAF05888.1	Phascolarctid_Herpesvirus_1 AEX15649.1	Miniopterus_schreibersii_Gammaherpesvirus_1 AMY98786.1	Saimiriine_Gammaherpesvirus_2 AAA46165.1	Sus_barbatus_rhadinovirus_1 AAO46908.2	Macropod_Herpesvirus_3 ABO61861.1	Macacine_Gammaherpesvirus_4 AAF05880.1	Human_Gammaherpesvirus_4 YP401712.1	Alcelaphine_Gammaherpesvirus_1 NP065512.1	Equid_Gammaherpesvirus_5 ACY71882.1	Equid_Gammaherpesvirus_2 NP042605.1
Fruit_bat_alphaherpesvirus_1 AB825953.1		50	39.1	41.3	26.1	26.1	23.9	28.3	28.3	23.9	28.3	28.3	28.3	21.7	23.9	30.4	28.3	19.6	23.9	21.7	19.6	15.2	17.4	21.7	17.4	13	19.6	15.2	15.2	19.6	19.6	17.4	17.4	17.4
Human_Alphaherpesvirus_1_BAM29052.1	50		45.5	55.8	23.3	30.2	30.2	32.6	34.9	25.6	34.9	34.9	34.9	32.6	32.6	32.6	29.5	23.3	20.9	20.9	20.9	16.3	18.6	20.5	16.3	16.3	18.6	18.6	18.6	25	25	18.2	20.9	16.3
Felid_Alphaherpesvirus_1 CAA12264.1	39.1	45.5		54.5	27.3	40.9	36.4	45.5	40.9	38.6	38.6	43.2	38.6	29.5	36.4	29.5	31.8	27.3	25	27.3	20.5	20.5	22.7	27.3	25	20.5	18.2	22.7	22.7	20.5	20.5	20.5	20.5	20.5
Equid_Alphaherpesvirus_4 NP045247.1	41.3	55.8	54.5		30.2	37.2	32.6	44.2	39.5	39.5	37.2	37.2	37.2	34.9	34.9	34.9	31.8	27.9	27.9	27.9	25.6	25.6	25.6	27.3	23.3	23.3	20.9	20.9	20.9	22.7	22.7	22.7	18.6	18.6
Bat_herpesvirus_isolate_RB_13HN56 KR261852.1	26.1	23.3	27.3	30.2		30.2	23.3	23.8	23.8	26.2	23.8	21.4	21.4	26.2	23.8	28.6	31.8	23.8	80.5	78	48.8	51.2	43.9	31.8	34.1	39	56.1	39	36.6	31.8	31.8	36.4	45.2	43.9
Psittacid_Alphaherpesvirus_1 AAQ73709.1	26.1	30.2	40.9	37.2	30.2		48.8	37.2	37.2	32.6	34.9	34.9	34.9	25.6	32.6	23.3	36.4	27.9	32.6	32.6	30.2	25.6	25.6	18.2	18.6	23.3	25.6	20.9	23.3	20.5	20.5	29.5	27.9	30.2
Gallid_Alphaherpesvirus_1 AAD56202.1	23.9	30.2	36.4	32.6	23.3	48.8		32.6	30.2	30.2	27.9	34.9	32.6	25.6	30.2	27.9	43.2	32.6	23.3	23.3	23.3	25.6	23.3	20.5	27.9	23.3	23.3	25.6	25.6	22.7	22.7	22.7	27.9	25.6
Miniopterus_schreibersii_Betaherpesvirus_2 AMY98771.1	28.3	32.6	45.5	44.2	23.8	37.2	32.6		90.5	83.3	90.5	88.1	69	59.5	73.8	38.1	40.9	35.7	26.2	28.6	28.6	23.8	26.2	18.2	23.8	26.2	23.8	21.4	28.6	15.9	18.2	20.5	23.8	21.4
CH6-like_viruses	28.3	34.9	40.9	39.5	23.8	37.2	30.2	90.5		76.2	95.2	88.1	71.4	57.1	78.6	40.5	40.9	35.7	26.2	28.6	28.6	23.8	26.2	15.9	21.4	31	23.8	21.4	31	18.2	20.5	20.5	26.2	21.4
Bat_Betaherpesvirus_B7D8 AFK83885.1	23.9	25.6	38.6	39.5	26.2	32.6	30.2	83.3	76.2		76.2	76.2	64.3	57.1	73.8	42.9	40.9	33.3	28.6	31	26.2	23.8	23.8	15.9	21.4	26.2	23.8	21.4	31	15.9	18.2	20.5	21.4	19
Bat_Betaherpesvirus_2 BAI22795.1	28.3	34.9	38.6	37.2	23.8	34.9	27.9	90.5	95.2	76.2		85.7	69	54.8	76.2	42.9	38.6	35.7	26.2	28.6	28.6	23.8	26.2	15.9	21.4	28.6	23.8	21.4	28.6	18.2	20.5	20.5	26.2	21.4
E22-like_viruses	28.3	34.9	43.2	37.2	21.4	34.9	34.9	88.1	88.1	76.2	85.7		71.4	57.1	73.8	38.1	43.2	33.3	23.8	26.2	26.2	21.4	23.8	18.2	23.8	26.2	21.4	21.4	28.6	20.5	22.7	18.2	28.6	21.4
D15-like_viruses	28.3	34.9	38.6	37.2	21.4	34.9	32.6	69	71.4	64.3	69	71.4		54.8	71.4	40.5	43.2	35.7	23.8	26.2	28.6	23.8	23.8	18.2	23.8	26.2	21.4	23.8	23.8	22.7	25	20.5	31	21.4
CH20-like_viruses	21.7	32.6	29.5	34.9	26.2	25.6	25.6	59.5	57.1	57.1	54.8	57.1	54.8		61.9	40.5	31.8	35.7	26.2	26.2	28.6	21.4	21.4	15.9	16.7	16.7	19	19	21.4	15.9	18.2	22.7	26.2	23.8
NG46-like_viruses	23.9	32.6	36.4	34.9	23.8	32.6	30.2	73.8	78.6	73.8	76.2	73.8	71.4	61.9		40.5	40.9	38.1	26.2	28.6	31	21.4	26.2	15.9	26.2	26.2	21.4	23.8	28.6	18.2	20.5	18.2	26.2	21.4
Egyptian_Fruit_Bat_Betaherpesvirus ACY82598.1	30.4	32.6	29.5	34.9	28.6	23.3	27.9	38.1	40.5	42.9	42.9	38.1	40.5	40.5	40.5		40.9	28.6	28.6	28.6	19	26.2	19	18.2	16.7	16.7	26.2	16.7	21.4	20.5	20.5	18.2	21.4	19
Tupaiid_Betaherpesvirus_1 AAD08667.1	28.3	29.5	31.8	31.8	31.8	36.4	43.2	40.9	40.9	40.9	38.6	43.2	43.2	31.8	40.9	40.9		27.3	31.8	29.5	27.3	25	25	25	25	22.7	27.3	25	25	27.3	29.5	27.3	34.1	27.3
Suid_Betaherpesvirus_2 AAF80107.1	19.6	23.3	27.3	27.9	23.8	27.9	32.6	35.7	35.7	33.3	35.7	33.3	35.7	35.7	38.1	28.6	27.3		23.8	26.2	19	21.4	26.2	25	23.8	19	21.4	26.2	26.2	15.9	18.2	20.5	19	21.4
Bat_Herpesvirus ALH21060.1	23.9	20.9	25	27.9	80.5	32.6	23.3	26.2	26.2	28.6	26.2	23.8	23.8	26.2	26.2	28.6	31.8	23.8		92.3	59	61.5	53.8	28.6	33.3	43.6	61.5	43.6	43.6	35.7	35.7	45.2	57.5	53.8
N7050-like_viruses	21.7	20.9	27.3	27.9	78	32.6	23.3	28.6	28.6	31	28.6	26.2	26.2	26.2	28.6	28.6	29.5	26.2	92.3		59	59	59	31	33.3	46.2	61.5	48.7	46.2	35.7	35.7	42.9	60	56.4
Bat_Herpesvirus BAF80466.1	19.6	20.9	20.5	25.6	48.8	30.2	23.3	28.6	28.6	26.2	28.6	26.2	28.6	28.6	31	19	27.3	19	59	59		53.8	61.5	31	43.6	48.7	56.4	43.6	43.6	35.7	35.7	42.9	60	59
Ateline_Gammaherpesvirus_3 NP047983.1	15.2	16.3	20.5	25.6	51.2	25.6	25.6	23.8	23.8	23.8	23.8	21.4	23.8	21.4	21.4	26.2	25	21.4	61.5	59	53.8		59	33.3	48.7	46.2	76.9	53.8	51.3	42.9	42.9	45.2	45	43.6
Bovine_Gammapherpesvirus_4 AAC59454.1	17.4	18.6	22.7	25.6	43.9	25.6	23.3	26.2	26.2	23.8	26.2	23.8	23.8	21.4	26.2	19	25	26.2	53.8	59	61.5	59		38.1	53.8	51.3	61.5	61.5	46.2	45.2	45.2	52.4	57.5	59
Callitrichine_Gammaherpesvirus_3 AAF05888.1	21.7	20.5	27.3	27.3	31.8	18.2	20.5	18.2	15.9	15.9	15.9	18.2	18.2	15.9	15.9	18.2	25	25	28.6	31	31	33.3	38.1		47.6	31	38.1	45.2	38.1	61.9	59.5	40.5	28.6	28.6
Phascolarctid_Herpesvirus_1 AEX15649.1	17.4	16.3	25	23.3	34.1	18.6	27.9	23.8	21.4	21.4	21.4	23.8	23.8	16.7	26.2	16.7	25	23.8	33.3	33.3	43.6	48.7	53.8	47.6		38.5	51.3	51.3	46.2	47.6	45.2	38.1	37.5	41
Miniopterus_schreibersii_Gammaherpesvirus_1 AMY98786.1	13	16.3	20.5	23.3	39	23.3	23.3	26.2	31	26.2	28.6	26.2	26.2	16.7	26.2	16.7	22.7	19	43.6	46.2	48.7	46.2	51.3	31	38.5		43.6	41	41	33.3	31	35.7	45	41
Saimiriine_Gammaherpesvirus_2 AAA46165.1	19.6	18.6	18.2	20.9	56.1	25.6	23.3	23.8	23.8	23.8	23.8	21.4	21.4	19	21.4	26.2	27.3	21.4	61.5	61.5	56.4	76.9	61.5	38.1	51.3	43.6		53.8	51.3	42.9	42.9	50	50	51.3
Sus_barbatus_rhadinovirus_1 AAO46908.2	15.2	18.6	22.7	20.9	39	20.9	25.6	21.4	21.4	21.4	21.4	21.4	23.8	19	23.8	16.7	25	26.2	43.6	48.7	43.6	53.8	61.5	45.2	51.3	41	53.8		56.4	45.2	45.2	38.1	42.5	46.2
Macropod_Herpesvirus_3 ABO61861.1	15.2	18.6	22.7	20.9	36.6	23.3	25.6	28.6	31	31	28.6	28.6	23.8	21.4	28.6	21.4	25	26.2	43.6	46.2	43.6	51.3	46.2	38.1	46.2	41	51.3	56.4		40.5	42.9	31	42.5	38.5
Macacine_Gammaherpesvirus_4 AAF05880.1	19.6	25	20.5	22.7	31.8	20.5	22.7	15.9	18.2	15.9	18.2	20.5	22.7	15.9	18.2	20.5	27.3	15.9	35.7	35.7	35.7	42.9	45.2	61.9	47.6	33.3	42.9	45.2	40.5		90.5	40.5	42.9	28.6
Human_Gammaherpesvirus_4 YP401712.1	19.6	25	20.5	22.7	31.8	20.5	22.7	18.2	20.5	18.2	20.5	22.7	25	18.2	20.5	20.5	29.5	18.2	35.7	35.7	35.7	42.9	45.2	59.5	45.2	31	42.9	45.2	42.9	90.5		40.5	42.9	28.6
Alcelaphine_Gammaherpesvirus_1 NP065512.1	17.4	18.2	20.5	22.7	36.4	29.5	22.7	20.5	20.5	20.5	20.5	18.2	20.5	22.7	18.2	18.2	27.3	20.5	45.2	42.9	42.9	45.2	52.4	40.5	38.1	35.7	50	38.1	31	40.5	40.5		40.5	40.5
Equid_Gammaherpesvirus_5 ACY71882.1	17.4	20.9	20.5	18.6	45.2	27.9	27.9	23.8	26.2	21.4	26.2	28.6	31	26.2	26.2	21.4	34.1	19	57.5	60	60	45	57.5	28.6	37.5	45	50	42.5	42.5	42.9	42.9	40.5		77.5
Equid_Gammaherpesvirus_2 NP042605.1	17.4	16.3	20.5	18.6	43.9	30.2	25.6	21.4	21.4	19	21.4	21.4	21.4	23.8	21.4	19	27.3	21.4	53.8	56.4	59	43.6	59	28.6	41	41	51.3	46.2	38.5	28.6	28.6	40.5	77.5

## Sheet: Sequences
Sequence Name	Amino acid Sequence (with gaps)	Length (aa)	Amino acid Sequence (no gaps)	Length (aa)
Fruit_bat_alphaherpesvirus_1 AB825953.1	IGRNMLLATREYVHARWTTMPSVVAD-FPEAASMGTPEPFSM--RI	46	IGRNMLLATREYVHARWTTMPSVVADFPEAASMGTPEPFSMRI	43
Human_Alphaherpesvirus_1 BAM29052.1	IGREMLLATREYVHARWAAFEQ-LLADFPEAAD-MRAPGPY-SMRI	46	IGREMLLATREYVHARWAAFEQLLADFPEAADMRAPGPYSMRI	43
Felid_Alphaherpesvirus_1 CAA12264.1	IGRDMLLNTKHYVESRWATREG-VESDFPEAMTVTIPDKPY-NVQV	46	IGRDMLLNTKHYVESRWATREGVESDFPEAMTVTIPDKPYNVQV	44
Equid_Alphaherpesvirus_4 NP045247.1	IGRNMLLKTRDYVHYRWATREL-LETNFPGALN-FRNNKPY-SVRV	46	IGRNMLLKTRDYVHYRWATRELLETNFPGALNFRNNKPYSVRV	43
Bat_herpesvirus_isolate_RB_13HN56 KR261852.1	QGRNMLEKTKNYIEA--VTPER-LHEIVPAPF---NHEPDA-HFKV	46	QGRNMLEKTKNYIEAVTPERLHEIVPAPFNHEPDAHFKV	39
Psittacid_Alphaherpesvirus_1 AAQ73709.1	IGRDMLLKTKQYIEENWREYSN-IRERFFPAMA-HEGVPQY-SVAV	46	IGRDMLLKTKQYIEENWREYSNIRERFFPAMAHEGVPQYSVAV	43
Gallid_Alphaherpesvirus_1 AAD56202.1	IGRDMLLRTKAHIEKEWRSGNQ-FAEKFLPGSE-RIQLNQY-SVRV	46	IGRDMLLRTKAHIEKEWRSGNQFAEKFLPGSERIQLNQYSVRV	43
Miniopterus_schreibersii_Betaherpesvirus_2 AMY98771.1	IGRDMLSKTASYIHSNLSDRAG-LETFFTEAD--YIPDERV-SVRV	46	IGRDMLSKTASYIHSNLSDRAGLETFFTEADYIPDERVSVRV	42
CH6-like_viruses	IGRDMLSKTASYIHSNLSDRAG-LDAFFTEAD--YVPDESV-SVRV	46	IGRDMLSKTASYIHSNLSDRAGLDAFFTEADYVPDESVSVRV	42
Bat_Betaherpesvirus_B7D8 AFK83885.1	IGRDMLSKTANYIHSNLSDRAG-LGTFFADTD--FIPDERV-AVRV	46	IGRDMLSKTANYIHSNLSDRAGLGTFFADTDFIPDERVAVRV	42
Bat_Betaherpesvirus_2 BAI22795.1	IGRDMLSKTASYIHSNLSDRAG-LDAFFTEAD--YVPDERV-SARV	46	IGRDMLSKTASYIHSNLSDRAGLDAFFTEADYVPDERVSARV	42
E22-like_viruses	IGRDMLSRTASYIHSNLCDRAG-LGAFFTEAD--YIPDETV-SVRV	46	IGRDMLSRTASYIHSNLCDRAGLGAFFTEADYIPDETVSVRV	42
D15-like_viruses	IGRDMLSRTMEYIHSHLSDRSG-LCAFFNDAD--YLPDSEL-SVRV	46	IGRDMLSRTMEYIHSHLSDRSGLCAFFNDADYLPDSELSVRV	42
CH20-like_viruses	IGRGMLSSTAEYIHRSLSDREM-LSKFINEED--FIAGEEV-SVKV	46	IGRGMLSSTAEYIHRSLSDREMLSKFINEEDFIAGEEVSVKV	42
NG46-like_viruses	IGRDMLSSTANYIHSHLSDRSG-LSAFFAETD--YVSDEGV-SVRV	46	IGRDMLSSTANYIHSHLSDRSGLSAFFAETDYVSDEGVSVRV	42
Egyptian_Fruit_Bat_Betaherpesvirus ACY82598.1	IGRGMLADTSDYIHAHFGAREG-WARFVPDGA--FVPGTQV-KARV	46	IGRGMLADTSDYIHAHFGAREGWARFVPDGAFVPGTQVKARV	42
Tupaiid_Betaherpesvirus_1 AAD08667.1	IGRDMLSRTSAYIEAHFAEPAF-LARFFEPGDLPRADEPPP-TVRV	46	IGRDMLSRTSAYIEAHFAEPAFLARFFEPGDLPRADEPPPTVRV	44
Suid_Betaherpesvirus_2 AAF80107.1	IGRDMLRQTSDFINNVLSSREY-VSEKFSLSD--GDFQGDF-SLNV	46	IGRDMLRQTSDFINNVLSSREYVSEKFSLSDGDFQGDFSLNV	42
Bat_Herpesvirus ALH21060.1	QGRNMLEKTKNYIEAVTPER---LHEIVPAPF---NHEPNA-HFKV	46	QGRNMLEKTKNYIEAVTPERLHEIVPAPFNHEPNAHFKV	39
N7050-like_viruses	QGRNMLEKTKNYIEAVTPER---LHEIVPVPF---NHDPDA-HFKV	46	QGRNMLEKTKNYIEAVTPERLHEIVPVPFNHDPDAHFKV	39
Bat_Herpesvirus BAF80466.1	QGRRMLEKSKEYIESLTPEM---LSHIIQGPV---NHSPGA-SFRV	46	QGRRMLEKSKEYIESLTPEMLSHIIQGPVNHSPGASFRV	39
Ateline_Gammaherpesvirus_3 NP047983.1	QGRTMLEKSKAFIEEMTPVR---LQEIVPHKL---NHEHEA-KFRV	46	QGRTMLEKSKAFIEEMTPVRLQEIVPHKLNHEHEAKFRV	39
Bovine_Gammapherpesvirus_4 AAC59454.1	QGRTMLEKSKAFVEMITPER---LSDIVSYPV---PCDPDA-SFRV	46	QGRTMLEKSKAFVEMITPERLSDIVSYPVPCDPDASFRV	39
Callitrichine_Gammaherpesvirus_3 AAF05888.1	QGRTMLERAKVFVENLSLTD---LEKLAPCSATPWSFNPDG-ILRV	46	QGRTMLERAKVFVENLSLTDLEKLAPCSATPWSFNPDGILRV	42
Phascolarctid_Herpesvirus_1 AEX15649.1	QGRTMLERSKAFMESLSTSD---LESIVGHTV---PSEKDS-SLRV	46	QGRTMLERSKAFMESLSTSDLESIVGHTVPSEKDSSLRV	39
Miniopterus_schreibersii_Gammaherpesvirus_1 AMY98786.1	QGRNMLEKSKKLIESISIEQ---LKAISSISL----IDNSA-RFRV	46	QGRNMLEKSKKLIESISIEQLKAISSISLIDNSARFRV	38
Saimiriine_Gammaherpesvirus_2 AAA46165.1	QGRTMLEKSKIFIEAMTPDT---LQEIVPHIV---KHEPDA-KFRV	46	QGRTMLEKSKIFIEAMTPDTLQEIVPHIVKHEPDAKFRV	39
Sus_barbatus_rhadinovirus_1 AAO46908.2	QGRTMLESSKAFVETLAPSR---LLELTGHSF---LCDPDA-TFRV	46	QGRTMLESSKAFVETLAPSRLLELTGHSFLCDPDATFRV	39
Macropod_Herpesvirus_3 ABO61861.1	RGRTMLEKSKVFIEALCPSR---LGELLGETY---AHDDSA-QLRV	46	RGRTMLEKSKVFIEALCPSRLGELLGETYAHDDSAQLRV	39
Macacine_Gammaherpesvirus_4 AAF05880.1	QGRTMLERAKAFVEALSPAD---LQALAPTPNAWAPLNPEG-RLRV	46	QGRTMLERAKAFVEALSPADLQALAPTPNAWAPLNPEGRLRV	42
Human_Gammaherpesvirus_4 YP401712.1	QGRTMLERAKAFVEALSPAN---LQALAPSPDAWAPLNPEG-QLRV	46	QGRTMLERAKAFVEALSPANLQALAPSPDAWAPLNPEGQLRV	42
Alcelaphine_Gammaherpesvirus_1 NP065512.1	QGRTMLEKTKQFVENVTVEY---LQKICNFEVQCLPQHPNP-KFRV	46	QGRTMLEKTKQFVENVTVEYLQKICNFEVQCLPQHPNPKFRV	42
Equid_Gammaherpesvirus_5 ACY71882.1	QGRRMLERSKRYIEAVTPEG---LAAILRRPV--AACDPEA-SFKV	46	QGRRMLERSKRYIEAVTPEGLAAILRRPVAACDPEASFKV	40
Equid_Gammaherpesvirus_2 NP042605.1	QGRRMLENSKRYIEGVTPEG---LADILGRRV---ECAPDA-SFKV	46	QGRRMLENSKRYIEGVTPEGLADILGRRVECAPDASFKV	39
